# Supplementary material
Source: Springer Nature journal article supplement (https://www.springerprofessional.de/resource/supplementary/13638_2012_567_MOESM1_ESM.pdf/11897934)

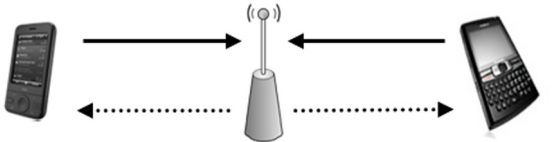

User  $U_0$

Relay  $R$

User  $U_1$

—————▶ First time slot

.....▶ Second time slot

Supplement: MOESM1 [file 11897934]
